# Supplementary material for: Intrasubtype Reassortments Cause Adaptive Amino Acid Replacements in H3N2 Influenza Genes
Source: PLoS Genet. 2014 Jan 9;10(1):e1004037. doi: 10.1371/journal.pgen.1004037 (PMC3886890; doi:10.1371/journal.pgen.1004037)
Supplement: Table S6 — Characteristics of RCBs and amino acid replacements. High confidence reassortments, two-point inference. (XLS) [file pgen.1004037.s007.xls]

## Sheet: mutations after RCBs
	PB2	PB1	PA	HA	NP	NA	M1	NS1
global dN/dS	0.0675837	0.0676764	0.0767598	0.269205	0.0730081	0.250434	0.0531903	0.345606
seq length	2271	1986	2142	1692	1485	1377	687	471
RCBs
Internal	37	27	61	41	53	15	21	2
Terminal	67	68	115	47	71	28	100	25
Descendant to RCBs
Branches with nonsynonymous substitutions	62	47	51	112	25	84	4	0
Nonsynonymous substitutions	71	60	66	146	27	113	4	0
Excess of nonsynonymous substitutions after reassortments
Mean distance between nonsynonymous substitution and most recent reassortment event, dS units
expected	0.0178782	0.019433	0.0148319	0.0204325	0.0118676	0.0102181	0.0264124	-
observed	0.0174077	0.0184405	0.0174072	0.0187468	0.0110772	0.0073054	0.0158545	-
Median distance between nonsynonymous substitution and most recent reassortment event, dS units
expected	0.0174244	0.0191085	0.0135577	0.0226082	0.010431	0.00950136	0.0241681	-
observed	0.0161003	0.0168501	0.0161793	0.0159127	0.0104424	0.00479054	0.0165925	-
Wilcoxon one-tailed p-value	0.3246	0.1008	0.9929	0.0207	0.2357	5.936e-10	0.02081	-
