# Supplementary material for: Intrasubtype Reassortments Cause Adaptive Amino Acid Replacements in H3N2 Influenza Genes
Source: PLoS Genet. 2014 Jan 9;10(1):e1004037. doi: 10.1371/journal.pgen.1004037 (PMC3886890; doi:10.1371/journal.pgen.1004037)
Supplement: Table S7 — Characteristics of RCBs and amino acid replacements. High confidence reassortments, three-point inference. (XLS) [file pgen.1004037.s008.xls]

## Sheet: mutations after RCBs
	PB2	PB1	PA	HA	NP	NA	M1	NS1
global dN/dS	0.0675837	0.0676764	0.0767598	0.269205	0.0730081	0.250434	0.0531903	0.345606
seq length	2271	1986	2142	1692	1485	1377	687	471
RCBs
Internal	45	31	73	47	61	21	25	3
Terminal	67	68	115	47	71	28	100	25
Descendant to RCBs
Branches with nonsynonymous substitutions	69	72	104	174	74	189	9	55
Nonsynonymous substitutions	78	90	125	250	94	272	9	64
Excess of nonsynonymous substitutions after reassortments
Mean distance between nonsynonymous substitution and most recent reassortment event, dS units
expected	0.0151642	0.0214544	0.0495227	0.0260728	0.0641181	0.0380381	0.0210844	0.0343281
observed	0.0156309	0.0235103	0.0501601	0.0240562	0.0707759	0.0346047	0.0127187	0.0329156
Median distance between nonsynonymous substitution and most recent reassortment event, dS units
expected	0.0123338	0.0190501	0.0281435	0.0244538	0.0192163	0.0190659	0.0181522	0.0401337
observed	0.0133136	0.0196646	0.0291881	0.022074	0.0504215	0.0143579	0.00899976	0.0356849
Wilcoxon one-tailed p-value	0.6068	0.8608	0.7626	0.01443	0.7913	0.0001225	0.01626	0.006164
